# Supplementary material
Source: publisher figshare collection journal article supplement (https://acs.figshare.com/ndownloader/files/4155616)
Supplement: Supplementary file 1 [file 4155616]

# SUPPORTING INFORMATION

## Formation of Different Gold Nanocrystal Core–Resin Shell Structures through the Control of the Core Assembly and Shell Polymerization

Zenhua Sun,<sup>\*,†,‡</sup> Zhihong Bao,<sup>†</sup> Caihong Fang,<sup>†</sup> and Jianfang Wang<sup>\*,†</sup>

<sup>†</sup>Department of Physics, The Chinese University of Hong Kong, Shatin, Hong Kong SAR, and

<sup>‡</sup>Shenyang National Laboratory for Materials Science, Institute of Metal Research, Chinese Academy of Sciences, 72 Wenhua Road, Shenyang 110016, China

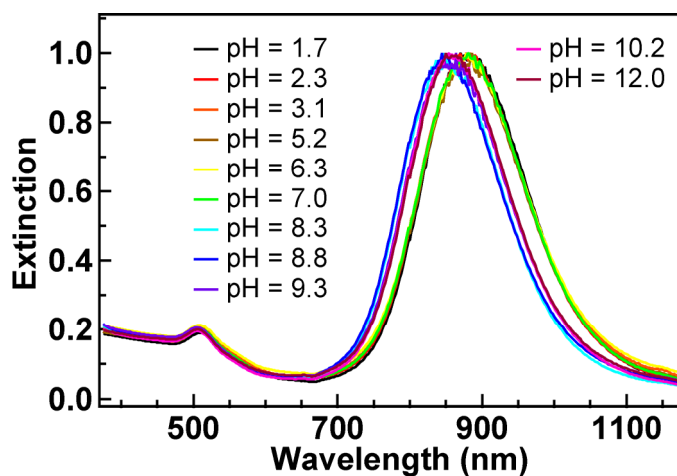

**Figure S1.** Normalized extinction spectra of the Au nanorod sample recorded at varying pH values in the absence of MP.

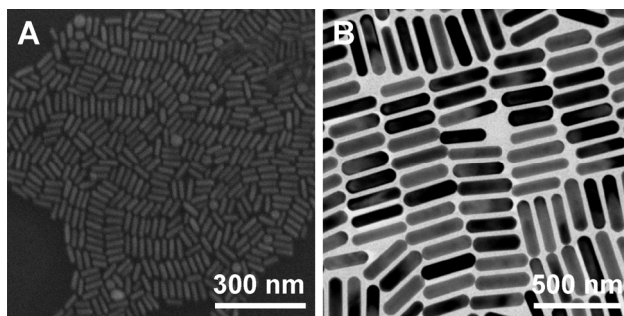

**Figure S2.** (A) SEM and (B) TEM images of the Au nanorod sample after the hydrothermal treatment at pH = 1.7 in the presence of MP and formaldehyde.

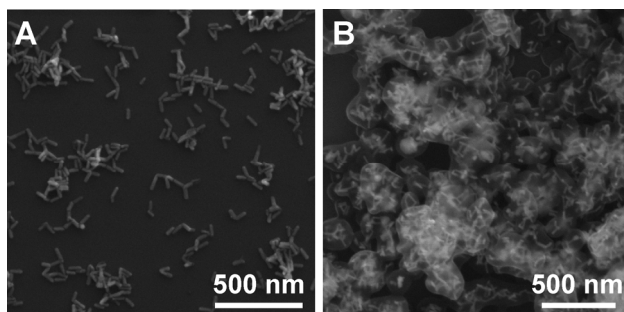

**Figure S3.** SEM images of the fused Au nanorods that are coated with (A) a thin resin shell and (B) a thick resin shell. The hydrothermal treatment was carried out with the pH adjusted between 8–9.

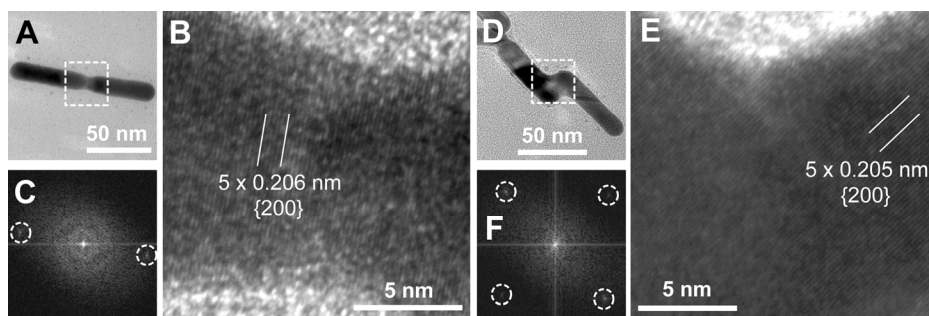

**Figure S4.** (A) TEM image of two Au nanorods that are linearly fused together at the ends. (B) HRTEM image of the boxed region in (A). The {200} lattice planes are indicated. (C) FFT pattern of the image in (B). The two spots enclosed by the dashed circles correspond to the {200} lattice planes. (D) TEM image of two Au nanorods that are fused together in a shoulder-to-shoulder manner and

parallel to each other. (E) HRTEM image of the boxed region in (D). The  $\{200\}$  lattice planes are indicated. (F) FFT pattern of the image in (E). The four spots enclosed by the dashed circles correspond to the  $\{200\}$  lattice planes.

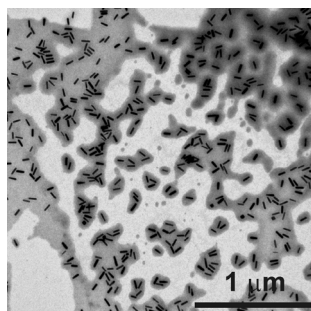

**Figure S5.** TEM image of the product obtained from the hydrothermal treatment with MP replaced by phenol. The pH was adjusted between 8–9 and the reactant weight ratio was controlled at nanorod : phenol : formaldehyde = 1 : 4.86 : 6.96.

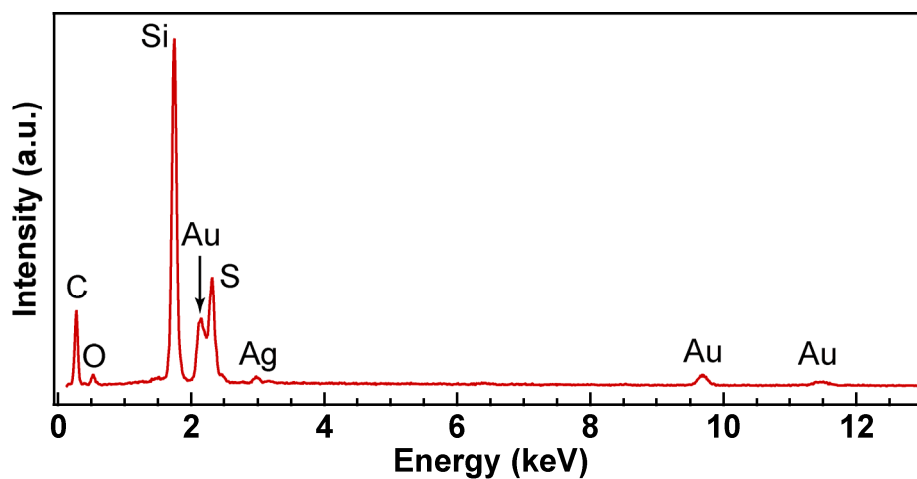

**Figure S6.** Energy-dispersive X-ray spectrum of the Au nanorod core-thick resin shell structures prepared at pH = 10.

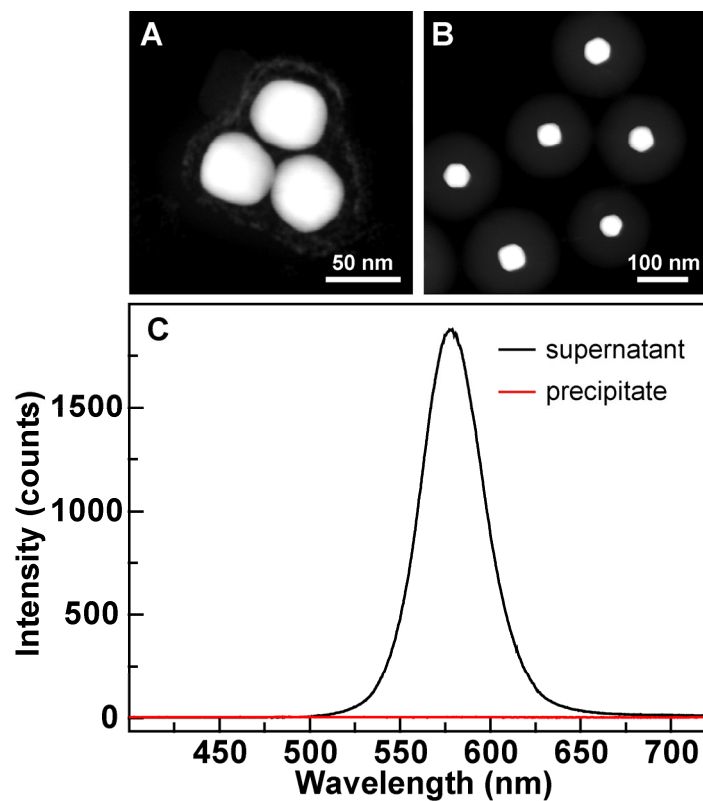

**Figure S7.** (A) STEM image of the Au nanopolyhedron–resin–CdTe nanocrystal hybrid nanostructures. (B) STEM image of the Au nanopolyhedron core–resin shell nanostructures after the control experiment of adsorbing pre-prepared CdTe nanocrystals. (C) Fluorescence emission spectra of the supernatant containing the pre-prepared CdTe nanocrystals and the precipitate containing the Au nanopolyhedron core–resin shell nanostructures.
